# Supplementary material for: Virucidal Activities of Acidic Electrolyzed Water Solutions with Different pH Values against Multiple Strains of SARS-CoV-2
Source: PubMed Central journal article supplement (PMC9888296; doi:10.1128/aem.01699-22), 2022-12-13
Supplement: aem.01699-22-s0001.pdf [file aem.01699-22-s0001.pdf]

**Supplementary Materials for “Differences in virucidal activities of acidic electrolyzed water with different pH against multiple strains of SARS-CoV-2”**

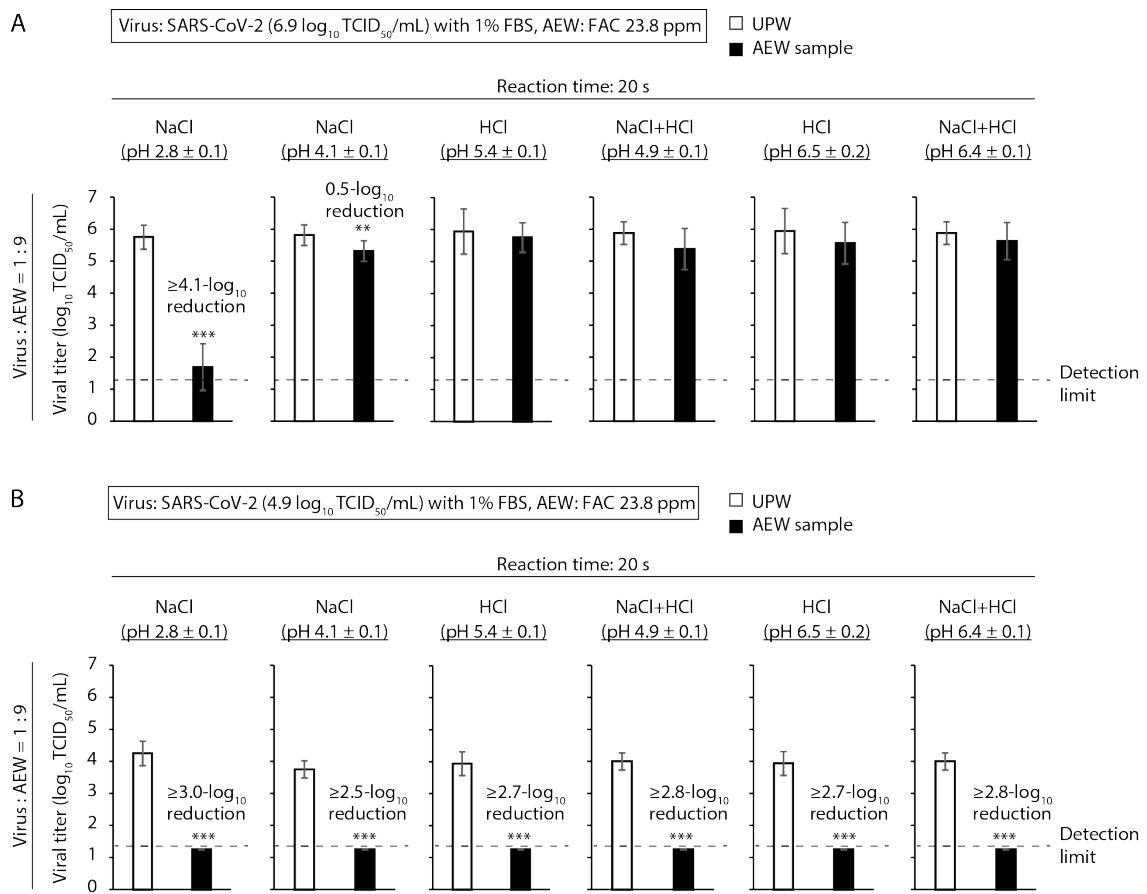

**Fig. S1.** Virucidal activities of various types of AEWs with low FAC concentrations against the SARS-CoV-2 ancestral stain. (A, B) SARS-CoV-2 (ancestral strain)-containing VGM with 1% FBS [viral titer: 6.9 (A) or 4.9 (B) log<sub>10</sub> TCID<sub>50</sub>/mL] was mixed with multiple AEWs (FAC concentration: 23.8 ± 1.6 ppm) at a ratio of 1:9. As a control,

virus solution was mixed with UPW. After 20 s, the viral titer of each mixture was evaluated. The detection limit of the viral titer was  $1.25 \log_{10}$  TCID<sub>50</sub>/mL. Error bars indicate mean  $\pm$  SD ( $n = 8$ ). Student's *t*-tests were used to analyze the statistical significance of differences between UPW and each AEW group; \*\* $p < 0.01$ , \*\*\* $p < 0.001$ .

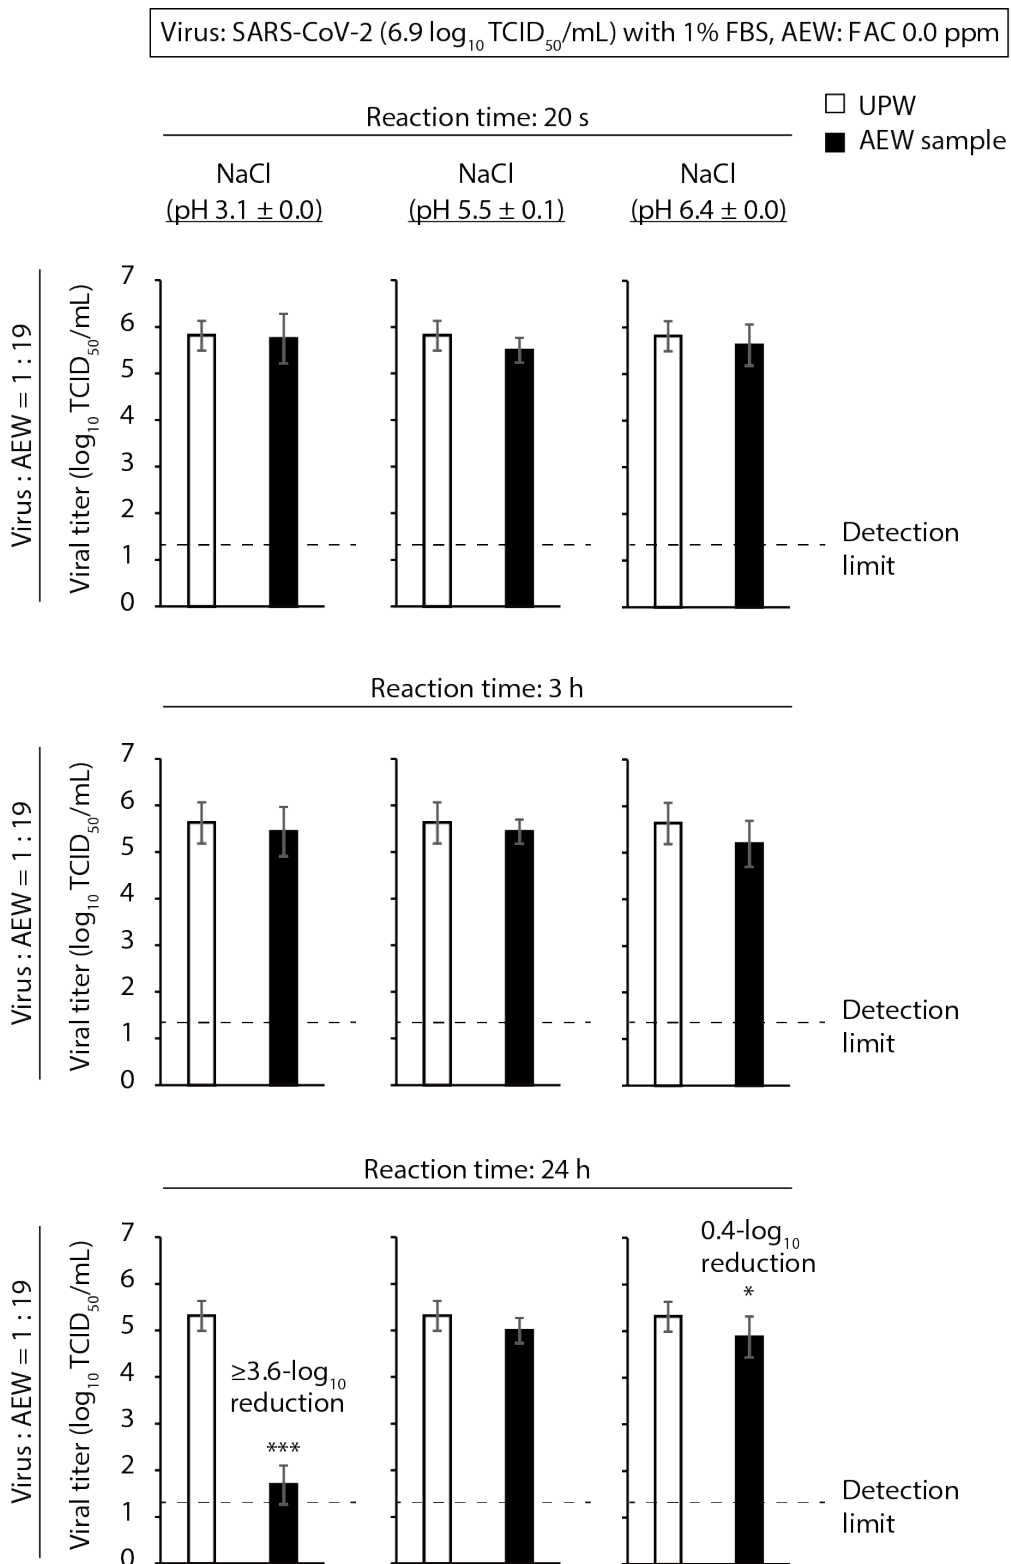

**Fig. S2.** Virucidal activities of FAC-free AEWs against the SARS-CoV-2 ancestral strain.

SARS-CoV-2 (ancestral strain)-containing VGM with 1% FBS (viral titer:  $6.9 \log_{10}$

TCID<sub>50</sub>/mL) was mixed with AEWs (FAC concentration: 0.0 ppm) with different pH at a ratio of 1:19. As a control, virus solution was mixed with UPW. After 20 s, 3 h, or 24 h, the viral titer of each mixture was evaluated. The detection limit of the viral titer was 1.25 log<sub>10</sub> TCID<sub>50</sub>/mL. Error bar indicates mean ± SD ( $n = 8$ ). Student's *t*-tests were used to analyze the statistical significance of differences between UPW and each AEW group; \*\* $p < 0.05$ , \*\*\* $p < 0.001$ .
